# Supplementary figures and images for: Anti-tumoral action of cannabinoids on hepatocellular carcinoma: role of AMPK-dependent activation of autophagy
Source: Springer Nature journal article supplement (doi:10.1038/cdd.2011.32), 2011-04-08

# Supp Fig 2

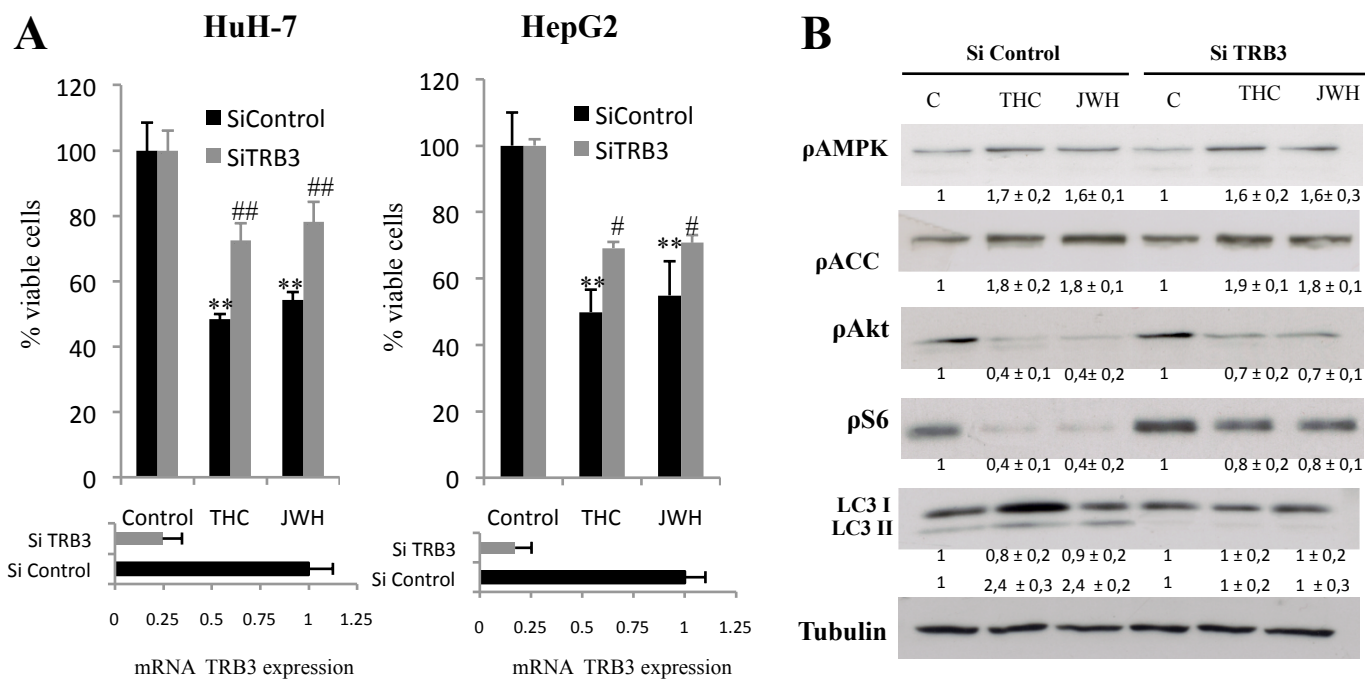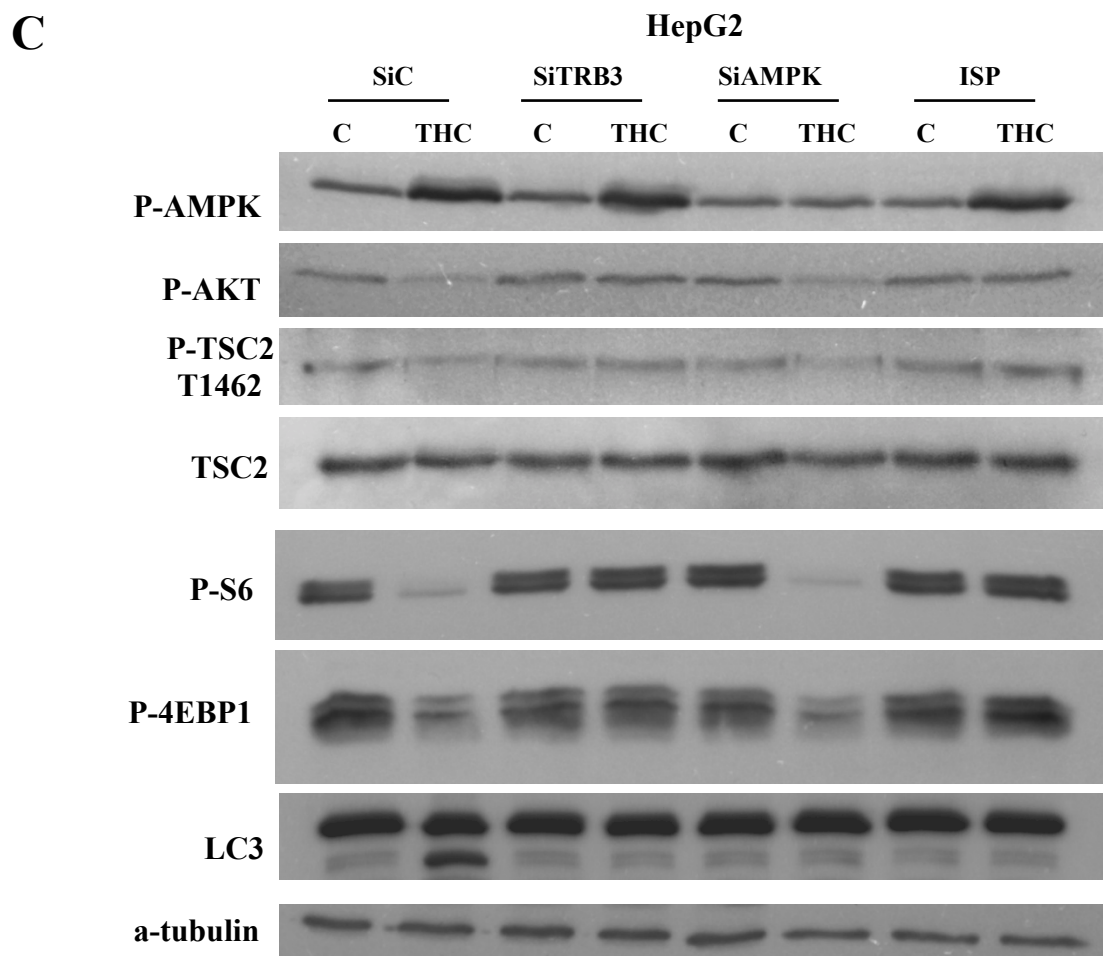

Supplement: 41418_2011_BFcdd201132_MOESM41_ESM.pdf [file 41418_2011_BFcdd201132_MOESM41_ESM.pdf]

HuH-7

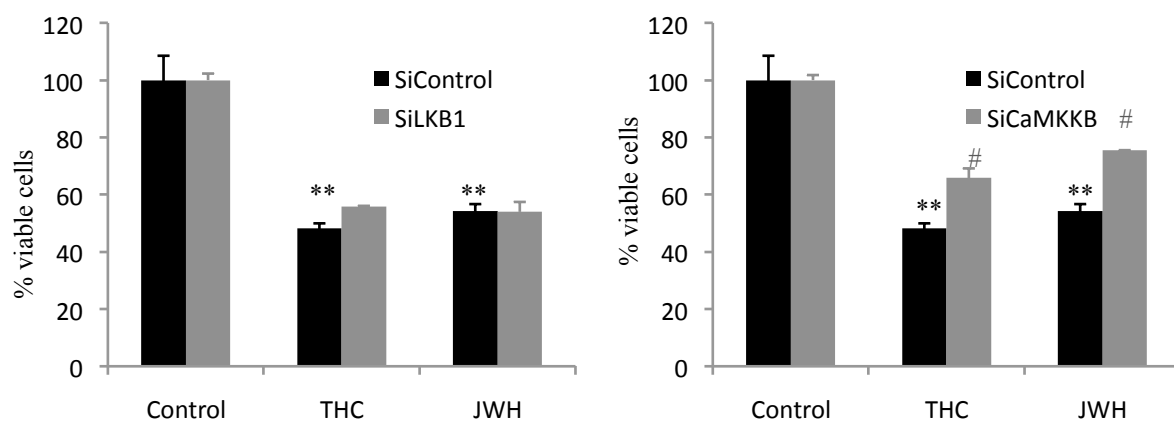

Supplement: 41418_2011_BFcdd201132_MOESM42_ESM.pdf [file 41418_2011_BFcdd201132_MOESM42_ESM.pdf]
